# Supplementary material for: Attitudes of the Public to Receiving Medical Care during Emergencies through Remote Physician–Patient Communications
Source: MDPI journal article supplement (doi:10.3390/ijerph17145236), 2020-07-20
Supplement: s1 [file s1]

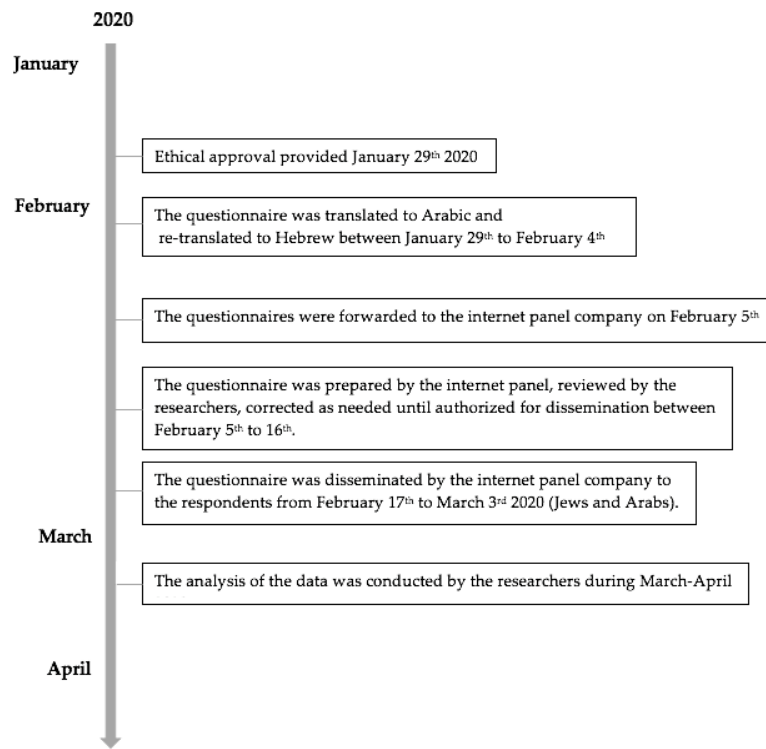

**Figure S1.** Timeline of study procedures.
